# Supplementary material
Source: publisher site journal article supplement (https://www.dovepress.com/article/326299)
Supplement: Supplementary file 1 [file get_supplementary_file.php]

# Supplemental Data

## Supplemental Table 1 Clinician Survey

### Screening Questions

**Select your role:** (select only one)

|                          |                            |
|--------------------------|----------------------------|
| <input type="checkbox"/> | Physician (MD, DO, MD/PhD) |
| <input type="checkbox"/> | Nurse practitioner (NP)    |
| <input type="checkbox"/> | Physician assistant (PA)   |
| <input type="checkbox"/> | None of these <screen out> |

**Select your specialty:** (select only one)

|                          |                                     |
|--------------------------|-------------------------------------|
| <input type="checkbox"/> | Psychiatry                          |
| <input type="checkbox"/> | Internal medicine <screen out>      |
| <input type="checkbox"/> | Family medicine <screen out>        |
| <input type="checkbox"/> | Other (please specify) <screen out> |

**Approximately how many individual patients do you personally see each week?**

\_\_\_\_\_ / per week <if 0, screen out>

**Approximately what percentage of your patients are child/adolescents (<18 years)?**

\_\_\_\_\_ %

**Approximately how many individual patients (total) do you personally manage for schizophrenia each month?**

\_\_\_\_\_ /per month <if 0, screen out>

**Approximately how many individual child/adolescent (<18 years) patients do you personally manage for schizophrenia each month?**

\_\_\_\_\_ /per month <do NOT screen on this question>

**Do you consider yourself an academic or community-based clinician? (select only one)**

|                          |                                                                                         |
|--------------------------|-----------------------------------------------------------------------------------------|
| <input type="checkbox"/> | Community-based (most patients are seen in a private practice or non-teaching hospital) |
| <input type="checkbox"/> | Academic-based (most patients are seen in a university/teaching hospital or practice)   |

**Case-vignette Questions**

**Case #1:** A 23-year-old man presents to you as an inpatient in a psychiatric unit. He was recently admitted because of agitation associated with hallucinations and delusions. He first experienced psychotic symptoms about 2 months ago but they have become progressively worse and his functioning has become grossly impaired. When distressed he seems to have awareness that something is wrong; however, when he is calm he does not and becomes unsure about the need of treatment. To date, he has not been treated with any antipsychotic medication.

**1. How likely are you to discuss the option of a long-acting injectable (LAI) antipsychotic with this patient at this point?**

|                          |                          |                          |                          |                          |
|--------------------------|--------------------------|--------------------------|--------------------------|--------------------------|
| Definitely will not      | Probably will not        | May or may not           | Probably will            | Definitely will          |
| <input type="checkbox"/> |

**2. How likely are you to recommend transitioning this patient to a LAI medication?**

|                          |                          |                          |                          |                          |
|--------------------------|--------------------------|--------------------------|--------------------------|--------------------------|
| Definitely will not      | Probably will not        | May or may not           | Probably will            | Definitely will          |
| <input type="checkbox"/> |

**Case 1 (cont.):** He is discharged on oral antipsychotic medication with instructions to follow-up at the Community Mental Health Center. At a follow-up visit three months later, he has had marked improvement in the severity of his symptoms. He is able to focus his attention elsewhere during hallucinations. There are no signs of sedation or other adverse effects.

**3. How likely are you to discuss the option of a long-acting injectable (LAI) antipsychotic with this patient at this point?**

| Definitely will not      | Probably will not        | May or may not           | Probably will            | Definitely will          |
|--------------------------|--------------------------|--------------------------|--------------------------|--------------------------|
| <input type="checkbox"/> |

**4. How likely are you to recommend transitioning this patient to a LAI medication?**

| Definitely will not      | Probably will not        | May or may not           | Probably will            | Definitely will          |
|--------------------------|--------------------------|--------------------------|--------------------------|--------------------------|
| <input type="checkbox"/> |

**4a.** [if likelihood = 1-3] **Why would you choose not to transition to a LAI?** (please describe) [open]

**4b.** [if likelihood = 3-5] **Why would you choose to transition to a LAI?** (please describe) [open]

**Case #2:** A 35-year-old woman with a 10-year history of schizophrenia presents for follow-up. Six months ago, she was hospitalized due to paranoid delusions after forgetting to pick up a refill of her oral antipsychotic medication from the pharmacy. She was stabilized on an oral antipsychotic while hospitalized, and continued on this treatment following discharge.

This patient recently has become divorced and is currently living alone. She has no other friends and family in town that help with her medical care. She presents now 2 months post-discharge. Today, she states she is taking her medication, doing well, and denies any symptoms.

**5. How likely is this patient to experience a relapse if continued on the same regimen? (please select one)**

| Definitely will not      | Probably will not        | May or may not           | Probably will            | Definitely will          |
|--------------------------|--------------------------|--------------------------|--------------------------|--------------------------|
| <input type="checkbox"/> |

**6. How likely are you to discuss the option of a long-acting injectable (LAI) antipsychotic with this patient at this point? (please select one)**

| Definitely will not      | Probably will not        | May or may not           | Probably will            | Definitely will          |
|--------------------------|--------------------------|--------------------------|--------------------------|--------------------------|
| <input type="checkbox"/> |

**7. How likely are you to recommend transitioning this patient to a LAI medication?**

| Definitely will not      | Probably will not        | May or may not           | Probably will            | Definitely will          |
|--------------------------|--------------------------|--------------------------|--------------------------|--------------------------|
| <input type="checkbox"/> |

**7a.** [if likelihood = 1-3] **Why would you choose not to transition to a LAI?** [open]

**7b.** [if likelihood = 3-5] **Why would you choose to transition to a LAI?** [open]

**Case #3:** A 50-year-old woman with schizophrenia diagnosed at age 35 presents for follow-up. She has been functioning reasonably well now on oral antipsychotic medication, but has a history of multiple relapses. She was recently hospitalized due to an exacerbation of unrelated acute bronchitis, for which she was prescribed multiple other oral medications. She reports some difficulty in remembering to take all her medications.

**8. How likely is this patient to experience a relapse?**

| Definitely will not      | Probably will not        | May or may not           | Probably will            | Definitely will          |
|--------------------------|--------------------------|--------------------------|--------------------------|--------------------------|
| <input type="checkbox"/> |

**9. How likely are you to discuss the option of a LAI antipsychotic with this patient at this point?**

| Definitely will not      | Probably will not        | May or may not           | Probably will            | Definitely will          |
|--------------------------|--------------------------|--------------------------|--------------------------|--------------------------|
| <input type="checkbox"/> |

**10. How likely are you to recommend transitioning this patient to a LAI medication?**

| Definitely will not      | Probably will not        | May or may not           | Probably will            | Definitely will          |
|--------------------------|--------------------------|--------------------------|--------------------------|--------------------------|
| <input type="checkbox"/> |

**10a.** [if likelihood = 1-3] **Why would you choose not to transition to a LAI?** [open]

**10b.** [if likelihood = 3-5] **Why would you choose to transition to a LAI?** [open]

**Case #4:** A 16-year-old high school junior with schizophrenia diagnosed six months ago is functioning reasonably well on oral antipsychotic medication. She also is on 2-3 other oral medications.

**11. How likely is this patient to experience a relapse?**

| Definitely will not      | Probably will not        | May or may not           | Probably will            | Definitely will          |
|--------------------------|--------------------------|--------------------------|--------------------------|--------------------------|
| <input type="checkbox"/> |

**12. How likely are you to discuss the option of a LAI antipsychotic with this patient at this point?**

| Definitely will not      | Probably will not        | May or may not           | Probably will            | Definitely will          |
|--------------------------|--------------------------|--------------------------|--------------------------|--------------------------|
| <input type="checkbox"/> |

**13. How likely are you to recommend transitioning this patient to a LAI medication?**

| Definitely will not      | Probably will not        | May or may not           | Probably will            | Definitely will          |
|--------------------------|--------------------------|--------------------------|--------------------------|--------------------------|
| <input type="checkbox"/> |

**13a.** [if likelihood = 1-3] **Why would you choose not to transition to a LAI?** [open]

**13b.** [if likelihood = 3-5] **Why would you choose to transition to a LAI?** [open]

**Case #5:** A 30-year-old man with schizophrenia presents for follow-up. He recently returned to college after a 7-year hiatus due to poorly controlled symptoms. He is finally on an oral antipsychotic medication regimen that has helped him function better. He states that he consistently takes his medication. He wonders if he will ever be able to stop taking medications and tells you he does not want this “daily reminder” that he is chronically mentally ill.

**14. How likely is this patient to experience a relapse?**

| Definitely will not      | Probably will not        | May or may not           | Probably will            | Definitely will          |
|--------------------------|--------------------------|--------------------------|--------------------------|--------------------------|
| <input type="checkbox"/> |

**15. How likely are you to discuss the option of a LAI antipsychotic with this patient at this point?**

| Definitely will not      | Probably will not        | May or may not           | Probably will            | Definitely will          |
|--------------------------|--------------------------|--------------------------|--------------------------|--------------------------|
| <input type="checkbox"/> |

**16. How likely are you to recommend transitioning this patient to a LAI medication?**

| Definitely will not      | Probably will not        | May or may not           | Probably will            | Definitely will          |
|--------------------------|--------------------------|--------------------------|--------------------------|--------------------------|
| <input type="checkbox"/> |

**16a.** [if likelihood = 1-3] **Why would you choose not to transition to a LAI?** [open]

**16b.** [if likelihood = 3-5] **Why would you choose to transition to a LAI?** [open]

**Case 5 (cont.):** You decide not to alter his medication at this point. One month later, he is hospitalized due to a relapse in which he was experiencing hallucinations, delusions, and disordered thinking which were severely interfering with daily functioning and leading to failing grades. A family member reports that he is inconsistent in taking his medication, despite their efforts to assist with this.

**17. How likely are you to discuss the option of a LAI antipsychotic with this patient at this point?**

|                          |                          |                          |                          |                          |
|--------------------------|--------------------------|--------------------------|--------------------------|--------------------------|
| Definitely will not      | Probably will not        | May or may not           | Probably will            | Definitely will          |
| <input type="checkbox"/> |

**18. How likely are you to recommend transitioning this patient to a LAI medication?**

|                          |                          |                             |                          |                          |
|--------------------------|--------------------------|-----------------------------|--------------------------|--------------------------|
| Not at all likely        | Unlikely                 | Neither likely nor unlikely | Likely                   | Very likely              |
| <input type="checkbox"/> | <input type="checkbox"/> | <input type="checkbox"/>    | <input type="checkbox"/> | <input type="checkbox"/> |

**18a.** [if likelihood = 1-3] **Why would you choose not to transition to a LAI?** [open]

**18b.** [if likelihood = 3-5] **Why would you choose to transition to a LAI?** [open]

Please answer the following general questions about your experience managing patients with schizophrenia.

**19. What type of patient do you find most suitable for a LAI antipsychotic?**

|  |
|--|
|  |
|--|

**20. What type of patient do you find least suitable for a LAI antipsychotic?**

|  |
|--|
|  |
|--|

**21. When you do transition from an oral to a LAI antipsychotic medication for a patient with schizophrenia, what is your typical approach? (select one)**

|                          |                          |                          |                                    |                                    |
|--------------------------|--------------------------|--------------------------|------------------------------------|------------------------------------|
| Always switch molecules  | Mostly switch molecules  | Depends on the patient   | Mostly stay with the same molecule | Always stay with the same molecule |
| <input type="checkbox"/> | <input type="checkbox"/> | <input type="checkbox"/> | <input type="checkbox"/>           | <input type="checkbox"/>           |

**22. Please rate your level of agreement with the following statements about your typical patient with schizophrenia.**

|                                                                                                        | Strongly disagree        | Disagree                 | Neutral                  | Agree                    | Strongly agree           |
|--------------------------------------------------------------------------------------------------------|--------------------------|--------------------------|--------------------------|--------------------------|--------------------------|
| Long-acting injectable (LAI) antipsychotics are saved for patients with more severe symptoms           | <input type="checkbox"/> |
| I primarily use LAIs in my patients with adherence concerns                                            | <input type="checkbox"/> |
| I have concerns of stigmatization when I diagnose an individual with schizophrenia                     | <input type="checkbox"/> |
| I have concerns of stigmatization when I prescribe a LAI for a patient with schizophrenia              | <input type="checkbox"/> |
| Most patients on oral antipsychotic medication for schizophrenia will eventually have adherence issues | <input type="checkbox"/> |

**23. Which approach best characterizes how you prefer to make a final treatment decision for patients with schizophrenia? (select only one)**

|                          |                                                                                                         |
|--------------------------|---------------------------------------------------------------------------------------------------------|
| <input type="checkbox"/> | I prefer to make the final decision about which treatment my patients receive                           |
| <input type="checkbox"/> | I prefer to make the final decision after seriously considering the patient's/caregiver's opinion       |
| <input type="checkbox"/> | I prefer that the patient/caregiver and I share responsibility for deciding which treatment is best     |
| <input type="checkbox"/> | I prefer that the patient/caregiver make the final decision, but after seriously considering my opinion |
| <input type="checkbox"/> | I prefer to leave all decisions regarding treatment to the patient/caregiver                            |

**24. In general, please rank the following goals you have when initiating an antipsychotic medication for your patients with schizophrenia. (1 = most important, 5 = least important)**

|                          |                                                     |
|--------------------------|-----------------------------------------------------|
| <input type="checkbox"/> | Reducing the potential for future psychotic relapse |
| <input type="checkbox"/> | Improving social/occupational functioning           |
| <input type="checkbox"/> | Managing co-morbid psychological or medical issues  |
| <input type="checkbox"/> | Improve quality of life                             |
| <input type="checkbox"/> | Minimize side effects                               |

**25. Please indicate the significance of each of the following barriers to the optimal management of patients with schizophrenia: (select one for each item)**

|                                                                          | Not applicable or not at all significant | Slightly significant     | Moderately significant   | Very significant         | Extremely significant    |
|--------------------------------------------------------------------------|------------------------------------------|--------------------------|--------------------------|--------------------------|--------------------------|
| Patient nonadherence                                                     | <input type="checkbox"/>                 | <input type="checkbox"/> | <input type="checkbox"/> | <input type="checkbox"/> | <input type="checkbox"/> |
| Medication side effects                                                  | <input type="checkbox"/>                 | <input type="checkbox"/> | <input type="checkbox"/> | <input type="checkbox"/> | <input type="checkbox"/> |
| Comorbid medical conditions                                              | <input type="checkbox"/>                 | <input type="checkbox"/> | <input type="checkbox"/> | <input type="checkbox"/> | <input type="checkbox"/> |
| Comorbid mental health conditions                                        | <input type="checkbox"/>                 | <input type="checkbox"/> | <input type="checkbox"/> | <input type="checkbox"/> | <input type="checkbox"/> |
| Lack of social support                                                   | <input type="checkbox"/>                 | <input type="checkbox"/> | <input type="checkbox"/> | <input type="checkbox"/> | <input type="checkbox"/> |
| Lack of coordination of care                                             | <input type="checkbox"/>                 | <input type="checkbox"/> | <input type="checkbox"/> | <input type="checkbox"/> | <input type="checkbox"/> |
| Social stigma of a schizophrenia diagnosis                               | <input type="checkbox"/>                 | <input type="checkbox"/> | <input type="checkbox"/> | <input type="checkbox"/> | <input type="checkbox"/> |
| Lack of efficacy of antipsychotic medications despite complete adherence | <input type="checkbox"/>                 | <input type="checkbox"/> | <input type="checkbox"/> | <input type="checkbox"/> | <input type="checkbox"/> |

**26. Please indicate the significance of each of the following barriers to the optimal use of long-acting injectable antipsychotics in patients with schizophrenia: (select one for each item)**

|                                                                                                                                           | Not applicable or not at all significant | Slightly significant     | Moderately significant   | Very significant         | Extremely significant    |
|-------------------------------------------------------------------------------------------------------------------------------------------|------------------------------------------|--------------------------|--------------------------|--------------------------|--------------------------|
| Patient aversion to needles                                                                                                               | <input type="checkbox"/>                 | <input type="checkbox"/> | <input type="checkbox"/> | <input type="checkbox"/> | <input type="checkbox"/> |
| Logistical issues (eg, lack of storage of medication, lack of staff to manage injections, lack of patient transportation to appointments) | <input type="checkbox"/>                 | <input type="checkbox"/> | <input type="checkbox"/> | <input type="checkbox"/> | <input type="checkbox"/> |
| Short dosing intervals                                                                                                                    | <input type="checkbox"/>                 | <input type="checkbox"/> | <input type="checkbox"/> | <input type="checkbox"/> | <input type="checkbox"/> |
| Lack of experience with prescribing injectable treatment                                                                                  | <input type="checkbox"/>                 | <input type="checkbox"/> | <input type="checkbox"/> | <input type="checkbox"/> | <input type="checkbox"/> |
| Clinicians think patients aren't interested in or would not want to take a LAI                                                            | <input type="checkbox"/>                 | <input type="checkbox"/> | <input type="checkbox"/> | <input type="checkbox"/> | <input type="checkbox"/> |
| Limited comfort in discussing pros and cons of LAIs                                                                                       | <input type="checkbox"/>                 | <input type="checkbox"/> | <input type="checkbox"/> | <input type="checkbox"/> | <input type="checkbox"/> |
| Increased cost compared to oral medications                                                                                               | <input type="checkbox"/>                 | <input type="checkbox"/> | <input type="checkbox"/> | <input type="checkbox"/> | <input type="checkbox"/> |

**27. Are there any other barriers you've experienced related to use of LAI antipsychotics in your patients with schizophrenia?**

**28. Please rate your level of agreement with the following statements about your typical patient with schizophrenia.**

|                                                                                                            | Strongly disagree        | Disagree                 | Neutral                  | Agree                    | Strongly agree           |
|------------------------------------------------------------------------------------------------------------|--------------------------|--------------------------|--------------------------|--------------------------|--------------------------|
| LAI antipsychotics are as safe as other medications for schizophrenia management                           | <input type="checkbox"/> |
| Patients are able to tolerate LAI antipsychotics as much as other medications for schizophrenia management | <input type="checkbox"/> |
| Patients on LAIs have more severe symptoms than patients on other medications                              | <input type="checkbox"/> |
| LAI have similar efficacy as other medications to stabilize disease                                        | <input type="checkbox"/> |
| LAI have similar efficacy as other medications to prevent relapse                                          | <input type="checkbox"/> |

**29. How confident are you in the following aspects of schizophrenia management? (select one for each item)**

|                                                                            | Not at all confident     | Slightly confident       | Moderately confident     | Very confident           | Extremely confident      |
|----------------------------------------------------------------------------|--------------------------|--------------------------|--------------------------|--------------------------|--------------------------|
| Determining when to begin treatment                                        | <input type="checkbox"/> |
| Selecting treatment                                                        | <input type="checkbox"/> |
| Discussing the use of injectable therapy with my patients                  | <input type="checkbox"/> |
| Initiating injectable therapy                                              | <input type="checkbox"/> |
| Administering injectable therapy in my practice                            | <input type="checkbox"/> |
| Transitioning a stable patient from an oral to an injectable antipsychotic | <input type="checkbox"/> |

**30. How comfortable are you in initiating a conversation related to transitioning from an oral medication to a LAI?**

| Not at all comfortable   | Uncomfortable            | Neither comfortable nor uncomfortable | Comfortable              | Very comfortable         |
|--------------------------|--------------------------|---------------------------------------|--------------------------|--------------------------|
| <input type="checkbox"/> | <input type="checkbox"/> | <input type="checkbox"/>              | <input type="checkbox"/> | <input type="checkbox"/> |

**a. [if comfort = 1-3] What information/education would you need to increase your comfort in these situations? [open]**

**b. [if comfort = 4-5] How do you typically initiate this discussion? [open]**

**31. Please rate your familiarity with the following new or emerging therapies for schizophrenia:**  
(select one for each item)

|                                                       | Not at all familiar      | Slightly familiar        | Moderately familiar      | Very familiar            | Extremely familiar       |
|-------------------------------------------------------|--------------------------|--------------------------|--------------------------|--------------------------|--------------------------|
| ALKS 3831 (combination of olanzapine and samidorphan) | <input type="checkbox"/> |
| Lumateperone                                          | <input type="checkbox"/> |
| Roluperidone                                          | <input type="checkbox"/> |
| Pimavanserin                                          | <input type="checkbox"/> |
| TAK-831                                               | <input type="checkbox"/> |

**32. How likely are you to seek out information on new or emerging therapies for schizophrenia?**  
(select one)

| Not at all likely        | Slightly likely          | Moderately likely        | Very likely              | Extremely likely         |
|--------------------------|--------------------------|--------------------------|--------------------------|--------------------------|
| <input type="checkbox"/> |

**33. Please list one or two topics that you would find valuable for upcoming CE opportunities related to schizophrenia:**

|  |
|--|
|  |
|--|

**Demographic Questions**

**34. How many years have you been in psychiatry practice? \_\_\_\_\_**

**35. How many individuals would you consider a part of your support staff (ie, nurses, medical assistants, etc.)? \_\_\_\_\_**

**36. What percentage of your patients (adult or pediatric) with schizophrenia are currently using a LAI antipsychotic? \_\_\_\_\_%**

**37. Have you received additional certification in Child/Adolescent Psychiatry?" (select only one)**

|                          |     |
|--------------------------|-----|
| <input type="checkbox"/> | Yes |
| <input type="checkbox"/> | No  |

**38. Practice location:** (select only one)

|                          |          |
|--------------------------|----------|
| <input type="checkbox"/> | Urban    |
| <input type="checkbox"/> | Suburban |
| <input type="checkbox"/> | Rural    |

**39. Present employment:** (select only one)

|                          |                                                        |
|--------------------------|--------------------------------------------------------|
| <input type="checkbox"/> | Solo practice                                          |
| <input type="checkbox"/> | Group single-specialty practice                        |
| <input type="checkbox"/> | Group multi-specialty practice                         |
| <input type="checkbox"/> | Academic/university hospital/medical school            |
| <input type="checkbox"/> | Non-government community hospital/mental health center |
| <input type="checkbox"/> | Government/military/VA hospital                        |
| <input type="checkbox"/> | Other (please specify)                                 |

**Supplemental Table 2** Clinician discussion/recommendation of LAI antipsychotic medications by scenario<sup>a</sup>

| Response to case presentations                       | %                       |                                |                    |
|------------------------------------------------------|-------------------------|--------------------------------|--------------------|
|                                                      | Psychiatrist<br>(n=302) | Psychiatric<br>NP/PA<br>(n=77) | Overall<br>(n=379) |
| <b>Case 1</b>                                        |                         |                                |                    |
| Discuss LAI antipsychotic medication                 |                         |                                |                    |
| Definitely will not                                  | 11                      | 5                              | 10                 |
| Probably will not                                    | 21                      | 14                             | 19                 |
| May or may not                                       | 22                      | 31                             | 24                 |
| Probably will                                        | 27                      | 30                             | 28                 |
| Definitely will                                      | 19                      | 20                             | 19                 |
| Recommend transition to LAI antipsychotic medication |                         |                                |                    |
| Definitely will not                                  | 5                       | 3                              | 5                  |
| Probably will not                                    | 15                      | 7                              | 14                 |
| May or may not                                       | 34                      | 31                             | 33                 |
| Probably will                                        | 32                      | 38                             | 33                 |
| Definitely will                                      | 14                      | 22                             | 16                 |
| <b>Case 1 (continued)</b>                            |                         |                                |                    |
| Discuss LAI antipsychotic medication                 |                         |                                |                    |
| Definitely will not                                  | 8                       | 1                              | 7                  |
| Probably will not                                    | 29                      | 25                             | 28                 |
| May or may not                                       | 21                      | 26                             | 22                 |
| Probably will                                        | 29                      | 30                             | 19                 |
| Definitely will                                      | 14                      | 18                             | 14                 |
| Recommend transition to LAI antipsychotic medication |                         |                                |                    |
| Definitely will not                                  | 7                       | 0                              | 5                  |
| Probably will not                                    | 29                      | 25                             | 28                 |
| May or may not                                       | 30                      | 33                             | 30                 |
| Probably will                                        | 25                      | 26                             | 25                 |
| Definitely will                                      | 10                      | 17                             | 12                 |
| <b>Case 2</b>                                        |                         |                                |                    |
| Discuss LAI antipsychotic medication                 |                         |                                |                    |
| Definitely will not                                  | 1                       | 0                              | 1                  |
| Probably will not                                    | 8                       | 1                              | 6                  |
| May or may not                                       | 14                      | 5                              | 12                 |
| Probably will                                        | 44                      | 53                             | 46                 |
| Definitely will                                      | 33                      | 40                             | 34                 |
| Recommend transition to LAI antipsychotic medication |                         |                                |                    |
| Definitely will not                                  | 1                       | 0                              | 1                  |
| Probably will not                                    | 10                      | 1                              | 8                  |
| May or may not                                       | 23                      | 22                             | 22                 |
| Probably will                                        | 43                      | 39                             | 42                 |
| Definitely will                                      | 24                      | 38                             | 27                 |

| Response to case presentations                       | %                       |                                |                    |
|------------------------------------------------------|-------------------------|--------------------------------|--------------------|
|                                                      | Psychiatrist<br>(n=302) | Psychiatric<br>NP/PA<br>(n=77) | Overall<br>(n=379) |
| <b>Case 3</b>                                        |                         |                                |                    |
| Discuss LAI antipsychotic medication                 |                         |                                |                    |
| Definitely will not                                  | 0                       | 0                              | 0                  |
| Probably will not                                    | 1                       | 1                              | 1                  |
| May or may not                                       | 6                       | 4                              | 6                  |
| Probably will                                        | 35                      | 46                             | 38                 |
| Definitely will                                      | 57                      | 49                             | 56                 |
| Recommend transition to LAI antipsychotic medication |                         |                                |                    |
| Definitely will not                                  | 0                       | 0                              | 0                  |
| Probably will not                                    | 1                       | 1                              | 1                  |
| May or may not                                       | 9                       | 9                              | 9                  |
| Probably will                                        | 41                      | 47                             | 42                 |
| Definitely will                                      | 49                      | 42                             | 48                 |
| <b>Case 4</b>                                        |                         |                                |                    |
| Discuss LAI antipsychotic medication                 |                         |                                |                    |
| Definitely will not                                  | 6                       | 5                              | 6                  |
| Probably will not                                    | 23                      | 22                             | 22                 |
| May or may not                                       | 33                      | 34                             | 34                 |
| Probably will                                        | 28                      | 26                             | 28                 |
| Definitely will                                      | 10                      | 13                             | 11                 |
| Recommend transition to LAI antipsychotic medication |                         |                                |                    |
| Definitely will not                                  | 5                       | 5                              | 5                  |
| Probably will not                                    | 25                      | 27                             | 25                 |
| May or may not                                       | 39                      | 37                             | 39                 |
| Probably will                                        | 22                      | 21                             | 22                 |
| Definitely will                                      | 9                       | 9                              | 9                  |
| <b>Case 5</b>                                        |                         |                                |                    |
| Discuss LAI antipsychotic medication                 |                         |                                |                    |
| Definitely will not                                  | 1                       | 0                              | 1                  |
| Probably will not                                    | 1                       | 0                              | 1                  |
| May or may not                                       | 7                       | 3                              | 6                  |
| Probably will                                        | 31                      | 34                             | 32                 |
| Definitely will                                      | 60                      | 64                             | 61                 |
| Recommend transition to LAI antipsychotic medication |                         |                                |                    |
| Definitely will not                                  | 1                       | 0                              | 1                  |
| Probably will not                                    | 2                       | 0                              | 1                  |
| May or may not                                       | 12                      | 12                             | 12                 |
| Probably will                                        | 35                      | 27                             | 34                 |
| Definitely will                                      | 51                      | 61                             | 53                 |

| Response to case presentations                       | %                       |                                |                    |
|------------------------------------------------------|-------------------------|--------------------------------|--------------------|
|                                                      | Psychiatrist<br>(n=302) | Psychiatric<br>NP/PA<br>(n=77) | Overall<br>(n=379) |
| <b>Case 5 (continued)</b>                            |                         |                                |                    |
| Discuss LAI antipsychotic medication                 |                         |                                |                    |
| Definitely will not                                  | 0                       | 0                              | 0                  |
| Probably will not                                    | 0                       | 0                              | 1                  |
| May or may not                                       | 0                       | 3                              | 12                 |
| Probably will                                        | 12                      | 5                              | 34                 |
| Definitely will                                      | 87                      | 92                             | 53                 |
| Recommend transition to LAI antipsychotic medication |                         |                                |                    |
| Definitely will not                                  | 0                       | 0                              | 0                  |
| Probably will not                                    | 0                       | 0                              | 0                  |
| May or may not                                       | 1                       | 3                              | 1                  |
| Probably will                                        | 14                      | 8                              | 11                 |
| Definitely will                                      | 85                      | 90                             | 88                 |

**Note:** <sup>a</sup>Totals may not equal 100% because of rounding.

**Abbreviations:** LAI, long-acting injectable; NP, nurse practitioner; PA, physician assistant.

**Supplemental Table 3** Clinician perception of relapse by scenario<sup>a</sup>

| How likely is this patient to experience a relapse if continued on the same regimen? | %                       |                                |                    |
|--------------------------------------------------------------------------------------|-------------------------|--------------------------------|--------------------|
|                                                                                      | Psychiatrist<br>(n=302) | Psychiatric<br>NP/PA<br>(n=77) | Overall<br>(n=379) |
| <b>Case 2</b>                                                                        |                         |                                |                    |
| Definitely will not                                                                  | 0                       | 0                              | 0                  |
| Probably will not                                                                    | 8                       | 4                              | 7                  |
| May or may not                                                                       | 36                      | 33                             | 36                 |
| Probably will                                                                        | 47                      | 52                             | 48                 |
| Definitely will                                                                      | 9                       | 12                             | 10                 |
| <b>Case 3</b>                                                                        |                         |                                |                    |
| Definitely will not                                                                  | 0                       | 0                              | 0                  |
| Probably will not                                                                    | 1                       | 0                              | 1                  |
| May or may not                                                                       | 8                       | 8                              | 8                  |
| Probably will                                                                        | 58                      | 73                             | 61                 |
| Definitely will                                                                      | 33                      | 20                             | 30                 |
| <b>Case 4</b>                                                                        |                         |                                |                    |
| Definitely will not                                                                  | 3                       | 0                              | 2                  |
| Probably will not                                                                    | 7                       | 9                              | 7                  |
| May or may not                                                                       | 49                      | 52                             | 50                 |
| Probably will                                                                        | 36                      | 35                             | 36                 |
| Definitely will                                                                      | 6                       | 4                              | 5                  |
| <b>Case 5</b>                                                                        |                         |                                |                    |
| Definitely will not                                                                  | 0                       | 0                              | 0                  |
| Probably will not                                                                    | 3                       | 3                              | 3                  |
| May or may not                                                                       | 23                      | 26                             | 24                 |
| Probably will                                                                        | 53                      | 51                             | 53                 |
| Definitely will                                                                      | 21                      | 21                             | 21                 |

**Note:** <sup>a</sup>Totals may not equal 100% because of rounding.

**Abbreviations:** NP, nurse practitioner; PA, physician assistant.

**Supplemental Table 4** Variables in the Equation

A. Q1

|                     |                   | B      | SE    | Wald  | df | Sig.        | Exp(B)       | 95% CI for Exp(B) |       |
|---------------------|-------------------|--------|-------|-------|----|-------------|--------------|-------------------|-------|
|                     |                   |        |       |       |    |             |              | Lower             | Upper |
| Step 1 <sup>a</sup> | V1_CONFIDENCE     | .467   | .204  | 5.249 | 1  | <b>.022</b> | <b>1.595</b> | 1.070             | 2.379 |
|                     | V2_MEDBARRIERS    | .304   | .211  | 2.074 | 1  | .150        | 1.356        | .896              | 2.051 |
|                     | V3_EMERGINGTx     | .409   | .196  | 4.339 | 1  | <b>.037</b> | <b>1.505</b> | 1.024             | 2.210 |
|                     | V4_LACKEXPERIENCE | .105   | .122  | .743  | 1  | .389        | 1.111        | .875              | 1.412 |
|                     | V5_PATIENTLIMIT   | -.362  | .182  | 3.975 | 1  | <b>.046</b> | <b>.696</b>  | .488              | .994  |
|                     | V6_SAFETY         | .494   | .185  | 7.110 | 1  | <b>.008</b> | <b>1.639</b> | 1.140             | 2.356 |
|                     | V7_EFFICACY       | -.265  | .145  | 3.315 | 1  | .069        | .767         | .577              | 1.020 |
|                     | V8_SOCIALBARRIERS | -.087  | .219  | .156  | 1  | .693        | .917         | .597              | 1.409 |
|                     | V11_STIGMA        | -.033  | .163  | .040  | 1  | .841        | .968         | .704              | 1.332 |
|                     | D1_SCHIZPTLOAD    | .008   | .003  | 5.724 | 1  | <b>.017</b> | <b>1.008</b> | 1.001             | 1.015 |
|                     | D3_YEARS          | -.022  | .013  | 2.594 | 1  | .107        | .979         | .953              | 1.005 |
|                     | D4_SUPPORT        | .019   | .011  | 2.877 | 1  | .090        | 1.019        | .997              | 1.042 |
|                     | D5_ROLE           | .171   | .321  | .285  | 1  | .594        | 1.187        | .633              | 2.224 |
|                     | D6_cert           | .183   | .270  | .457  | 1  | .499        | 1.201        | .707              | 2.039 |
|                     | Constant          | -3.880 | 1.402 | 7.657 | 1  | .006        | .021         |                   |       |

**Note:** <sup>a</sup>Variable(s) entered on step 1: V1\_CONFIDENCE, V2\_MEDBARRIERS, V3\_EMERGINGTx, V4\_LACKEXPERIENCE, V5\_PATIENTLIMIT, V6\_SAFETY, V7\_EFFICACY, V8\_SOCIALBARRIERS, V11\_STIGMA, D1\_SCHIZPTLOAD, D3\_YEARS, D4\_SUPPORT, D5\_ROLE, D6\_cert.

B. Q2

|                     |                   | B      | SE    | Wald   | df | Sig.        | Exp(B)       | 95% CI for Exp(B) |       |
|---------------------|-------------------|--------|-------|--------|----|-------------|--------------|-------------------|-------|
|                     |                   |        |       |        |    |             |              | Lower             | Upper |
| Step 1 <sup>a</sup> | V1_CONFIDENCE     | .683   | .206  | 11.053 | 1  | <b>.001</b> | <b>1.981</b> | 1.324             | 2.963 |
|                     | V2_MEDBARRIERS    | .111   | .211  | .276   | 1  | .599        | 1.117        | .739              | 1.689 |
|                     | V3_EMERGINGTx     | .622   | .204  | 9.273  | 1  | <b>.002</b> | <b>1.864</b> | 1.248             | 2.782 |
|                     | V4_LACKEXPERIENCE | -.279  | .126  | 4.933  | 1  | <b>.026</b> | <b>1.322</b> | 1.033             | 1.691 |
|                     | V5_PATIENTLIMIT   | -.377  | .182  | 4.295  | 1  | <b>.038</b> | <b>.686</b>  | .480              | .980  |
|                     | V6_SAFETY         | .370   | .184  | 4.043  | 1  | <b>.044</b> | <b>1.448</b> | 1.009             | 2.078 |
|                     | V7_EFFICACY       | -.071  | .142  | .252   | 1  | .616        | .931         | .705              | 1.230 |
|                     | V8_SOCIALBARRIERS | -.295  | .221  | 1.773  | 1  | .183        | .745         | .483              | 1.149 |
|                     | V11_STIGMA        | .079   | .165  | .228   | 1  | .633        | 1.082        | .783              | 1.495 |
|                     | D1_SCHIZPTLOAD    | .002   | .003  | .405   | 1  | .524        | 1.002        | .996              | 1.008 |
|                     | D3_YEARS          | -.019  | .013  | 1.968  | 1  | .161        | .981         | .956              | 1.007 |
|                     | D4_SUPPORT        | .023   | .012  | 3.984  | 1  | <b>.046</b> | <b>1.024</b> | 1.000             | 1.047 |
|                     | D5_ROLE           | .610   | .323  | 3.562  | 1  | .059        | 1.840        | .977              | 3.467 |
|                     | D6_cert           | .121   | .272  | .199   | 1  | .656        | 1.129        | .663              | 1.923 |
|                     | Constant          | -4.760 | 1.420 | 11.236 | 1  | .001        | .009         |                   |       |

**Note:** <sup>a</sup>Variable(s) entered on step 1: V1\_CONFIDENCE, V2\_MEDBARRIERS, V3\_EMERGINGTx, V4\_LACKEXPERIENCE, V5\_PATIENTLIMIT, V6\_SAFETY, V7\_EFFICACY, V8\_SOCIALBARRIERS, V11\_STIGMA, D1\_SCHIZPTLOAD, D3\_YEARS, D4\_SUPPORT, D5\_ROLE, D6\_cert.

C. Q3

|                     |                   | B      | SE    | Wald  | df | Sig.        | Exp(B)       | 95% CI for Exp(B) |       |
|---------------------|-------------------|--------|-------|-------|----|-------------|--------------|-------------------|-------|
|                     |                   |        |       |       |    |             |              | Lower             | Upper |
| Step 1 <sup>a</sup> | V1_CONFIDENCE     | .396   | .196  | 4.094 | 1  | <b>.043</b> | <b>1.486</b> | 1.012             | 2.182 |
|                     | V2_MEDBARRIERS    | -.010  | .204  | .003  | 1  | .959        | .990         | .664              | 1.475 |
|                     | V3_EMERGINGTx     | .431   | .189  | 5.185 | 1  | <b>.023</b> | <b>1.538</b> | 1.062             | 2.229 |
|                     | V4_LACKEXPERIENCE | -.241  | .119  | 4.091 | 1  | <b>.043</b> | <b>1.272</b> | 1.007             | 1.606 |
|                     | V5_PATIENTLIMIT   | -.442  | .175  | 6.371 | 1  | <b>.012</b> | <b>.643</b>  | .456              | .906  |
|                     | V6_SAFETY         | .261   | .178  | 2.147 | 1  | .143        | 1.298        | .916              | 1.841 |
|                     | V7_EFFICACY       | -.072  | .137  | .275  | 1  | .600        | .931         | .712              | 1.217 |
|                     | V8_SOCIALBARRIERS | -.175  | .213  | .678  | 1  | .410        | .839         | .553              | 1.273 |
|                     | V11_STIGMA        | .286   | .159  | 3.212 | 1  | .073        | 1.331        | .974              | 1.819 |
|                     | D1_SCHIZPTLOAD    | .003   | .003  | 1.105 | 1  | .293        | 1.003        | .997              | 1.009 |
|                     | D3_YEARS          | -.021  | .013  | 2.539 | 1  | .111        | .979         | .955              | 1.005 |
|                     | D4_SUPPORT        | .018   | .010  | 3.006 | 1  | .083        | 1.018        | .998              | 1.038 |
|                     | D5_ROLE           | .123   | .309  | .157  | 1  | .692        | 1.130        | .617              | 2.072 |
|                     | D6_cert           | .501   | .261  | 3.674 | 1  | .055        | 1.650        | .989              | 2.755 |
|                     | Constant          | -2.799 | 1.344 | 4.336 | 1  | .037        | .061         |                   |       |

**Note:** <sup>a</sup>Variable(s) entered on step 1: V1\_CONFIDENCE, V2\_MEDBARRIERS, V3\_EMERGINGTx, V4\_LACKEXPERIENCE, V5\_PATIENTLIMIT, V6\_SAFETY, V7\_EFFICACY, V8\_SOCIALBARRIERS, V11\_STIGMA, D1\_SCHIZPTLOAD, D3\_YEARS, D4\_SUPPORT, D5\_ROLE, D6\_cert.

D. Q4

|                     |                   | B      | SE    | Wald  | df | Sig.        | Exp(B)       | 95% CI for Exp(B) |       |
|---------------------|-------------------|--------|-------|-------|----|-------------|--------------|-------------------|-------|
|                     |                   |        |       |       |    |             |              | Lower             | Upper |
| Step 1 <sup>a</sup> | V1_CONFIDENCE     | .652   | .212  | 9.445 | 1  | <b>.002</b> | <b>1.919</b> | 1.266             | 2.907 |
|                     | V2_MEDBARRIERS    | .244   | .218  | 1.259 | 1  | .262        | 1.277        | .833              | 1.956 |
|                     | V3_EMERGINGTx     | .525   | .195  | 7.234 | 1  | <b>.007</b> | <b>1.691</b> | 1.153             | 2.480 |
|                     | V4_LACKEXPERIENCE | -.384  | .124  | 9.555 | 1  | <b>.002</b> | <b>1.468</b> | 1.151             | 1.873 |
|                     | V5_PATIENTLIMIT   | -.440  | .183  | 5.818 | 1  | <b>.016</b> | <b>.644</b>  | .450              | .921  |
|                     | V6_SAFETY         | .151   | .189  | .636  | 1  | .425        | 1.163        | .803              | 1.684 |
|                     | V7_EFFICACY       | -.129  | .142  | .820  | 1  | .365        | .879         | .665              | 1.162 |
|                     | V8_SOCIALBARRIERS | -.378  | .226  | 2.802 | 1  | .094        | .685         | .440              | 1.067 |
|                     | V11_STIGMA        | .253   | .169  | 2.252 | 1  | .133        | 1.288        | .925              | 1.793 |
|                     | D1_SCHIZPTLOAD    | .003   | .003  | 1.194 | 1  | .274        | 1.003        | .998              | 1.009 |
|                     | D3_YEARS          | -.022  | .014  | 2.494 | 1  | .114        | .978         | .952              | 1.005 |
|                     | D4_SUPPORT        | .011   | .009  | 1.548 | 1  | .213        | 1.011        | .994              | 1.029 |
|                     | D5_ROLE           | .243   | .324  | .564  | 1  | .452        | 1.275        | .676              | 2.406 |
|                     | D6_cert           | .755   | .275  | 7.554 | 1  | <b>.006</b> | <b>2.128</b> | 1.242             | 3.646 |
|                     | Constant          | -4.203 | 1.419 | 8.777 | 1  | .003        | .015         |                   |       |

**Note:** <sup>a</sup>Variable(s) entered on step 1: V1\_CONFIDENCE, V2\_MEDBARRIERS, V3\_EMERGINGTx, V4\_LACKEXPERIENCE, V5\_PATIENTLIMIT, V6\_SAFETY, V7\_EFFICACY, V8\_SOCIALBARRIERS, V11\_STIGMA, D1\_SCHIZPTLOAD, D3\_YEARS, D4\_SUPPORT, D5\_ROLE, D6\_cert.

E. Q6

|                     |                                                                                                             | B     | SE     | Wald   | df   | Sig.        | Exp(B)       | 95% CI for Exp(B) |        |
|---------------------|-------------------------------------------------------------------------------------------------------------|-------|--------|--------|------|-------------|--------------|-------------------|--------|
|                     |                                                                                                             |       |        |        |      |             |              | Lower             | Upper  |
| Step 1 <sup>a</sup> | V1_CONFIDENCE                                                                                               | .400  | .300   | 1.781  | 1    | .182        | 1.493        | .829              | 2.688  |
|                     | V2_MEDBARRIERS                                                                                              | .340  | .313   | 1.180  | 1    | .277        | 1.406        | .760              | 2.598  |
|                     | V3_EMERGINGTx                                                                                               | -.230 | .290   | .626   | 1    | .429        | .795         | .450              | 1.404  |
|                     | V4_LACKEXPERIENCE                                                                                           | .151  | .199   | .573   | 1    | .449        | 1.163        | .787              | 1.719  |
|                     | V5_PATIENTLIMIT                                                                                             | -.988 | .298   | 10.986 | 1    | <b>.001</b> | <b>.372</b>  | .207              | .668   |
|                     | V6_SAFETY                                                                                                   | .843  | .272   | 9.608  | 1    | <b>.002</b> | <b>2.323</b> | 1.363             | 3.959  |
|                     | V7_EFFICACY                                                                                                 | -.268 | .238   | 1.261  | 1    | .261        | .765         | .480              | 1.221  |
|                     | V8_SOCIALBARRIERS                                                                                           | .064  | .332   | .037   | 1    | .848        | 1.066        | .556              | 2.042  |
|                     | V11_STIGMA                                                                                                  | .047  | .252   | .035   | 1    | .852        | 1.048        | .639              | 1.718  |
|                     | D1_SCHIZPTLOAD                                                                                              | .000  | .005   | .011   | 1    | .916        | 1.000        | .992              | 1.009  |
|                     | D3_YEARS                                                                                                    | -.004 | .019   | .051   | 1    | .821        | .996         | .959              | 1.033  |
|                     | D4_SUPPORT                                                                                                  | -.009 | .011   | .641   | 1    | .423        | .991         | .971              | 1.013  |
|                     | D5_ROLE                                                                                                     | 1.505 | .610   | 6.092  | 1    | <b>.014</b> | <b>4.502</b> | 1.363             | 14.869 |
|                     | D6_cert                                                                                                     | .459  | .422   | 1.185  | 1    | .276        | 1.583        | .692              | 3.618  |
|                     | 5. How likely is this patient to experience a relapse if continued on the same regimen? – Please select one | 2.151 | .295   | 53.334 | 1    | <b>.000</b> | <b>8.592</b> | 4.824             | 15.304 |
| Constant            | -9.520                                                                                                      | 2.335 | 16.620 | 1      | .000 | .000        |              |                   |        |

**Note:** <sup>a</sup>Variable(s) entered on step 1: V1\_CONFIDENCE, V2\_MEDBARRIERS, V3\_EMERGINGTx, V4\_LACKEXPERIENCE, V5\_PATIENTLIMIT, V6\_SAFETY, V7\_EFFICACY, V8\_SOCIALBARRIERS, V11\_STIGMA, D1\_SCHIZPTLOAD, D3\_YEARS, D4\_SUPPORT, D5\_ROLE, D6\_cert, 5. How likely is this patient to experience a relapse if continued on the same regimen? – Please select one.

F. Q7

|                     |                                                                                                             | B      | SE    | Wald   | df | Sig.        | Exp(B)       | 95% CI for Exp(B) |        |
|---------------------|-------------------------------------------------------------------------------------------------------------|--------|-------|--------|----|-------------|--------------|-------------------|--------|
|                     |                                                                                                             |        |       |        |    |             |              | Lower             | Upper  |
| Step 1 <sup>a</sup> | V1_CONFIDENCE                                                                                               | .318   | .246  | 1.666  | 1  | .197        | 1.374        | .848              | 2.227  |
|                     | V2_MEDBARRIERS                                                                                              | .378   | .260  | 2.115  | 1  | .146        | 1.459        | .877              | 2.427  |
|                     | V3_EMERGINGTx                                                                                               | -.076  | .240  | .101   | 1  | .750        | .926         | .579              | 1.483  |
|                     | V4_LACKEXPERIENCE                                                                                           | .227   | .159  | 2.029  | 1  | .154        | 1.255        | .918              | 1.715  |
|                     | V5_PATIENTLIMIT                                                                                             | -.737  | .232  | 10.051 | 1  | <b>.002</b> | <b>.479</b>  | .304              | .755   |
|                     | V6_SAFETY                                                                                                   | .397   | .219  | 3.291  | 1  | .070        | 1.487        | .969              | 2.283  |
|                     | V7_EFFICACY                                                                                                 | -.007  | .179  | .002   | 1  | .967        | .993         | .698              | 1.411  |
|                     | V8_SOCIALBARRIERS                                                                                           | .059   | .273  | .047   | 1  | .828        | 1.061        | .622              | 1.811  |
|                     | V11_STIGMA                                                                                                  | -.037  | .208  | .031   | 1  | .860        | .964         | .641              | 1.449  |
|                     | D1_SCHIZPTLOAD                                                                                              | .001   | .004  | .054   | 1  | .816        | 1.001        | .993              | 1.009  |
|                     | D3_YEARS                                                                                                    | -.011  | .016  | .495   | 1  | .481        | .989         | .959              | 1.020  |
|                     | D4_SUPPORT                                                                                                  | -.006  | .010  | .367   | 1  | .545        | .994         | .976              | 1.013  |
|                     | D5_ROLE                                                                                                     | .189   | .403  | .221   | 1  | .639        | 1.208        | .548              | 2.662  |
|                     | D6_cert                                                                                                     | .442   | .344  | 1.647  | 1  | .199        | 1.556        | .792              | 3.056  |
|                     | 5. How likely is this patient to experience a relapse if continued on the same regimen? – Please select one | 2.000  | .241  | 68.756 | 1  | <b>.000</b> | <b>7.386</b> | 4.604             | 11.849 |
|                     | Constant                                                                                                    | -8.512 | 1.929 | 19.469 | 1  | .000        | .000         |                   |        |

**Note:** <sup>a</sup>Variable(s) entered on step 1: V1\_CONFIDENCE, V2\_MEDBARRIERS, V3\_EMERGINGTx, V4\_LACKEXPERIENCE, V5\_PATIENTLIMIT, V6\_SAFETY, V7\_EFFICACY, V8\_SOCIALBARRIERS, V11\_STIGMA, D1\_SCHIZPTLOAD, D3\_YEARS, D4\_SUPPORT, D5\_ROLE, D6\_cert, 5. How likely is this patient to experience a relapse if continued on the same regimen? – Please select one.

G. Q9

|                                                                            |                   | B     | SE     | Wald  | df          | Sig.          | Exp(B) | 95% CI for Exp(B) |        |
|----------------------------------------------------------------------------|-------------------|-------|--------|-------|-------------|---------------|--------|-------------------|--------|
|                                                                            |                   |       |        |       |             |               |        | Lower             | Upper  |
| Step 1 <sup>a</sup>                                                        | V1_CONFIDENCE     | -.149 | .540   | .076  | 1           | .783          | .862   | .299              | 2.482  |
|                                                                            | V2_MEDBARRIERS    | .472  | .550   | .736  | 1           | .391          | 1.603  | .546              | 4.709  |
|                                                                            | V3_EMERGINGTx     | .965  | .658   | 2.147 | 1           | .143          | 2.625  | .722              | 9.540  |
|                                                                            | V4_LACKEXPERIENCE | -.128 | .381   | .112  | 1           | .737          | .880   | .417              | 1.856  |
|                                                                            | V5_PATIENTLIMIT   | -.829 | .565   | 2.150 | 1           | .143          | .437   | .144              | 1.322  |
|                                                                            | V6_SAFETY         | .721  | .382   | 3.550 | 1           | .060          | 2.056  | .971              | 4.351  |
|                                                                            | V7_EFFICACY       | .660  | .384   | 2.955 | 1           | .086          | 1.935  | .912              | 4.105  |
|                                                                            | V8_SOCIALBARRIERS | .845  | .638   | 1.757 | 1           | .185          | 2.328  | .667              | 8.125  |
|                                                                            | V11_STIGMA        | -.260 | .478   | .295  | 1           | .587          | .771   | .302              | 1.968  |
|                                                                            | D1_SCHIZPTLOAD    | .008  | .011   | .442  | 1           | .506          | 1.008  | .985              | 1.030  |
|                                                                            | D3_YEARS          | .050  | .038   | 1.746 | 1           | .186          | 1.051  | .976              | 1.131  |
|                                                                            | D4_SUPPORT        | -.002 | .020   | .015  | 1           | .903          | .998   | .960              | 1.037  |
|                                                                            | D5_ROLE           | 1.165 | .987   | 1.393 | 1           | .238          | 3.207  | .463              | 22.206 |
|                                                                            | D6_cert           | .771  | .785   | .963  | 1           | .326          | 2.161  | .464              | 10.074 |
| 8. How likely is this patient to experience a relapse? – Please select one | 3.780             | .658  | 33.047 | 1     | <b>.000</b> | <b>43.811</b> | 12.075 | 158.954           |        |
| Constant                                                                   | -21.959           | 5.656 | 15.074 | 1     | .000        | .000          |        |                   |        |

**Note:** <sup>a</sup>Variable(s) entered on step 1: V1\_CONFIDENCE, V2\_MEDBARRIERS, V3\_EMERGINGTx, V4\_LACKEXPERIENCE, V5\_PATIENTLIMIT, V6\_SAFETY, V7\_EFFICACY, V8\_SOCIALBARRIERS, V11\_STIGMA, D1\_SCHIZPTLOAD, D3\_YEARS, D4\_SUPPORT, D5\_ROLE, D6\_cert, 8. How likely is this patient to experience a relapse? – Please select one.

H. Q10

|                     |                                                                           | B       | SE    | Wald   | df | Sig.        | Exp(B)        | 95% CI for Exp(B) |        |
|---------------------|---------------------------------------------------------------------------|---------|-------|--------|----|-------------|---------------|-------------------|--------|
|                     |                                                                           |         |       |        |    |             |               | Lower             | Upper  |
| Step 1 <sup>a</sup> | V1_CONFIDENCE                                                             | .481    | .383  | 1.579  | 1  | .209        | 1.618         | .764              | 3.427  |
|                     | V2_MEDBARRIERS                                                            | .397    | .400  | .986   | 1  | .321        | 1.487         | .680              | 3.255  |
|                     | V3_EMERGINGTx                                                             | .544    | .482  | 1.275  | 1  | .259        | 1.723         | .670              | 4.433  |
|                     | V4_LACKEXPERIENCE                                                         | .235    | .287  | .670   | 1  | .413        | 1.265         | .721              | 2.218  |
|                     | V5_PATIENTLIMIT                                                           | -.898   | .423  | 4.506  | 1  | <b>.034</b> | <b>.407</b>   | .178              | .933   |
|                     | V6_SAFETY                                                                 | .813    | .330  | 6.072  | 1  | <b>.014</b> | <b>2.254</b>  | 1.181             | 4.304  |
|                     | V7_EFFICACY                                                               | .218    | .315  | .477   | 1  | .490        | 1.243         | .670              | 2.307  |
|                     | V8_SOCIALBARRIERS                                                         | -.057   | .439  | .017   | 1  | .897        | .945          | .400              | 2.234  |
|                     | V11_STIGMA                                                                | .283    | .330  | .738   | 1  | .390        | 1.328         | .696              | 2.534  |
|                     | D1_SCHIZPTLOAD                                                            | .003    | .007  | .139   | 1  | .709        | 1.003         | .988              | 1.018  |
|                     | D3_YEARS                                                                  | .026    | .027  | .949   | 1  | .330        | 1.027         | .974              | 1.083  |
|                     | D4_SUPPORT                                                                | .012    | .025  | .216   | 1  | .642        | 1.012         | .963              | 1.062  |
|                     | D5_ROLE                                                                   | .138    | .654  | .045   | 1  | .832        | 1.149         | .319              | 4.138  |
|                     | D6_cert                                                                   | -.146   | .524  | .077   | 1  | .781        | .865          | .310              | 2.415  |
|                     | 8. How likely is this patient to experience a relapse? –Please select one | 3.198   | .512  | 39.077 | 1  | <b>.000</b> | <b>24.484</b> | 8.983             | 66.735 |
|                     | Constant                                                                  | -17.393 | 4.187 | 17.252 | 1  | .000        | .000          |                   |        |

**Note:** <sup>a</sup>Variable(s) entered on step 1: V1\_CONFIDENCE, V2\_MEDBARRIERS, V3\_EMERGINGTx, V4\_LACKEXPERIENCE, V5\_PATIENTLIMIT, V6\_SAFETY, V7\_EFFICACY, V8\_SOCIALBARRIERS, V11\_STIGMA, D1\_SCHIZPTLOAD, D3\_YEARS, D4\_SUPPORT, D5\_ROLE, D6\_cert, 8. How likely is this patient to experience a relapse? – Please select one.

I. Q12

|                     |                                                                             | B      | SE    | Wald   | df | Sig.        | Exp(B)       | 95% CI for Exp(B) |       |
|---------------------|-----------------------------------------------------------------------------|--------|-------|--------|----|-------------|--------------|-------------------|-------|
|                     |                                                                             |        |       |        |    |             |              | Lower             | Upper |
| Step 1 <sup>a</sup> | V1_CONFIDENCE                                                               | .469   | .237  | 3.927  | 1  | <b>.048</b> | <b>1.598</b> | 1.005             | 2.541 |
|                     | V2_MEDBARRIERS                                                              | -.187  | .239  | .615   | 1  | .433        | .829         | .519              | 1.324 |
|                     | V3_EMERGINGTx                                                               | .158   | .222  | .504   | 1  | .478        | 1.171        | .757              | 1.811 |
|                     | V4_LACKEXPERIENCE                                                           | -.290  | .143  | 4.146  | 1  | <b>.042</b> | <b>1.337</b> | 1.011             | 1.768 |
|                     | V5_PATIENTLIMIT                                                             | -.710  | .212  | 11.219 | 1  | <b>.001</b> | <b>.491</b>  | .324              | .745  |
|                     | V6_SAFETY                                                                   | .203   | .216  | .881   | 1  | .348        | 1.225        | .802              | 1.870 |
|                     | V7_EFFICACY                                                                 | -.107  | .171  | .389   | 1  | .533        | .899         | .642              | 1.258 |
|                     | V8_SOCIALBARRIERS                                                           | .023   | .254  | .008   | 1  | .927        | 1.023        | .623              | 1.682 |
|                     | V11_STIGMA                                                                  | .296   | .187  | 2.520  | 1  | .112        | 1.345        | .933              | 1.940 |
|                     | D1_SCHIZPTLOAD                                                              | .007   | .004  | 4.306  | 1  | <b>.038</b> | <b>1.007</b> | 1.000             | 1.014 |
|                     | D2_SETTING                                                                  | -.071  | .338  | .044   | 1  | .834        | .932         | .480              | 1.807 |
|                     | D3_YEARS                                                                    | -.011  | .015  | .488   | 1  | .485        | .989         | .960              | 1.020 |
|                     | D4_SUPPORT                                                                  | .007   | .012  | .325   | 1  | .568        | 1.007        | .984              | 1.030 |
|                     | D5_ROLE                                                                     | .154   | .366  | .178   | 1  | .673        | 1.167        | .570              | 2.389 |
|                     | D6_cert                                                                     | .357   | .308  | 1.341  | 1  | .247        | 1.429        | .781              | 2.612 |
|                     | 11. How likely is this patient to experience a relapse? – Please select one | 1.800  | .237  | 57.908 | 1  | <b>.000</b> | <b>6.050</b> | 3.805             | 9.618 |
|                     | Constant                                                                    | -8.262 | 1.747 | 22.369 | 1  | .000        | .000         |                   |       |

**Note:** <sup>a</sup>Variable(s) entered on step 1: V1\_CONFIDENCE, V2\_MEDBARRIERS, V3\_EMERGINGTx, V4\_LACKEXPERIENCE, V5\_PATIENTLIMIT, V6\_SAFETY, V7\_EFFICACY, V8\_SOCIALBARRIERS, V11\_STIGMA, D1\_SCHIZPTLOAD, D2\_SETTING, D3\_YEARS, D4\_SUPPORT, D5\_ROLE, D6\_cert, 11. How likely is this patient to experience a relapse? – Please select one.

J. Q13

|                     |                                                                             | B      | SE    | Wald   | df | Sig.        | Exp(B)       | 95% CI for Exp(B) |        |
|---------------------|-----------------------------------------------------------------------------|--------|-------|--------|----|-------------|--------------|-------------------|--------|
|                     |                                                                             |        |       |        |    |             |              | Lower             | Upper  |
| Step 1 <sup>a</sup> | V1_CONFIDENCE                                                               | .451   | .257  | 3.082  | 1  | .079        | 1.569        | .949              | 2.595  |
|                     | V2_MEDBARRIERS                                                              | -.163  | .257  | .404   | 1  | .525        | .849         | .513              | 1.406  |
|                     | V3_EMERGINGTx                                                               | .144   | .239  | .364   | 1  | .546        | 1.155        | .723              | 1.846  |
|                     | V4_LACKEXPERIENCE                                                           | -.343  | .152  | 5.078  | 1  | <b>.024</b> | <b>1.410</b> | 1.046             | 1.900  |
|                     | V5_PATIENTLIMIT                                                             | -.576  | .217  | 7.025  | 1  | <b>.008</b> | <b>.562</b>  | .367              | .861   |
|                     | V6_SAFETY                                                                   | .044   | .230  | .037   | 1  | .848        | 1.045        | .666              | 1.640  |
|                     | V7_EFFICACY                                                                 | -.116  | .179  | .421   | 1  | .516        | .890         | .627              | 1.264  |
|                     | V8_SOCIALBARRIERS                                                           | -.113  | .277  | .168   | 1  | .682        | .893         | .519              | 1.536  |
|                     | V11_STIGMA                                                                  | .105   | .199  | .279   | 1  | .597        | 1.111        | .752              | 1.640  |
|                     | D1_SCHIZPTLOAD                                                              | .009   | .004  | 6.485  | 1  | <b>.011</b> | <b>1.010</b> | 1.002             | 1.017  |
|                     | D2_SETTING                                                                  | .561   | .355  | 2.488  | 1  | .115        | 1.752        | .873              | 3.515  |
|                     | D3_YEARS                                                                    | -.002  | .016  | .018   | 1  | .895        | .998         | .966              | 1.030  |
|                     | D4_SUPPORT                                                                  | -.003  | .010  | .111   | 1  | .739        | .997         | .976              | 1.017  |
|                     | D5_ROLE                                                                     | .115   | .393  | .086   | 1  | .769        | 1.122        | .520              | 2.423  |
|                     | D6_cert                                                                     | .433   | .334  | 1.678  | 1  | .195        | 1.541        | .801              | 2.966  |
|                     | 11. How likely is this patient to experience a relapse? – Please select one | 2.126  | .270  | 62.024 | 1  | <b>.000</b> | <b>8.385</b> | 4.939             | 14.234 |
|                     | Constant                                                                    | -9.605 | 1.892 | 25.775 | 1  | .000        | .000         |                   |        |

**Note:** <sup>a</sup>Variable(s) entered on step 1: V1\_CONFIDENCE, V2\_MEDBARRIERS, V3\_EMERGINGTx, V4\_LACKEXPERIENCE, V5\_PATIENTLIMIT, V6\_SAFETY, V7\_EFFICACY, V8\_SOCIALBARRIERS, V11\_STIGMA, D1\_SCHIZPTLOAD, D2\_SETTING, D3\_YEARS, D4\_SUPPORT, D5\_ROLE, D6\_cert, 11. How likely is this patient to experience a relapse? – Please select one.

K. Q15

|                     |                                                                             | B     | SE    | Wald   | df   | Sig.        | Exp(B)       | 95% CI for Exp(B) |        |
|---------------------|-----------------------------------------------------------------------------|-------|-------|--------|------|-------------|--------------|-------------------|--------|
|                     |                                                                             |       |       |        |      |             |              | Lower             | Upper  |
| Step 1 <sup>a</sup> | V1_CONFIDENCE                                                               | .059  | .402  | .022   | 1    | .883        | 1.061        | .482              | 2.333  |
|                     | V2_MEDBARRIERS                                                              | .119  | .456  | .068   | 1    | .794        | 1.127        | .461              | 2.756  |
|                     | V3_EMERGINGTx                                                               | -.277 | .347  | .637   | 1    | .425        | .758         | .384              | 1.496  |
|                     | V4_LACKEXPERIENCE                                                           | -.154 | .261  | .346   | 1    | .556        | .858         | .514              | 1.430  |
|                     | V5_PATIENTLIMIT                                                             | .299  | .370  | .655   | 1    | .418        | 1.349        | .654              | 2.783  |
|                     | V6_SAFETY                                                                   | .544  | .322  | 2.850  | 1    | .091        | 1.722        | .916              | 3.238  |
|                     | V7_EFFICACY                                                                 | .466  | .278  | 2.807  | 1    | .094        | 1.593        | .924              | 2.748  |
|                     | V8_SOCIALBARRIERS                                                           | .581  | .443  | 1.718  | 1    | .190        | 1.788        | .750              | 4.261  |
|                     | V11_STIGMA                                                                  | -.362 | .333  | 1.180  | 1    | .277        | .696         | .363              | 1.338  |
|                     | D1_SCHIZPTLOAD                                                              | .001  | .008  | .036   | 1    | .849        | 1.001        | .987              | 1.017  |
|                     | D3_YEARS                                                                    | -.032 | .026  | 1.496  | 1    | .221        | .969         | .920              | 1.019  |
|                     | D4_SUPPORT                                                                  | -.009 | .020  | .174   | 1    | .677        | .992         | .953              | 1.032  |
|                     | D5_ROLE                                                                     | 1.184 | .884  | 1.793  | 1    | .181        | 3.268        | .578              | 18.491 |
|                     | D6_cert                                                                     | -.443 | .516  | .735   | 1    | .391        | .642         | .233              | 1.767  |
|                     | 14. How likely is this patient to experience a relapse? – Please select one | 1.536 | .343  | 20.094 | 1    | <b>.000</b> | <b>4.644</b> | 2.373             | 9.087  |
| Constant            | -9.323                                                                      | 3.236 | 8.303 | 1      | .004 | .000        |              |                   |        |

**Note:** <sup>a</sup>Variable(s) entered on step 1: V1\_CONFIDENCE, V2\_MEDBARRIERS, V3\_EMERGINGTx, V4\_LACKEXPERIENCE, V5\_PATIENTLIMIT, V6\_SAFETY, V7\_EFFICACY, V8\_SOCIALBARRIERS, V11\_STIGMA, D1\_SCHIZPTLOAD, D3\_YEARS, D4\_SUPPORT, D5\_ROLE, D6\_cert, 14. How likely is this patient to experience a relapse? – Please select one.

L. Q16

|                                                                             |                   | B     | SE     | Wald  | df          | Sig.         | Exp(B) | 95% CI for Exp(B) |       |
|-----------------------------------------------------------------------------|-------------------|-------|--------|-------|-------------|--------------|--------|-------------------|-------|
|                                                                             |                   |       |        |       |             |              |        | Lower             | Upper |
| Step 1 <sup>a</sup>                                                         | V1_CONFIDENCE     | .607  | .330   | 3.389 | 1           | .066         | 1.836  | .962              | 3.504 |
|                                                                             | V2_MEDBARRIERS    | .538  | .388   | 1.925 | 1           | .165         | 1.713  | .801              | 3.665 |
|                                                                             | V3_EMERGINGTx     | .029  | .348   | .007  | 1           | .933         | 1.029  | .520              | 2.037 |
|                                                                             | V4_LACKEXPERIENCE | -.185 | .238   | .601  | 1           | .438         | .831   | .521              | 1.326 |
|                                                                             | V5_PATIENTLIMIT   | .428  | .311   | 1.895 | 1           | .169         | 1.534  | .834              | 2.820 |
|                                                                             | V6_SAFETY         | .335  | .278   | 1.448 | 1           | .229         | 1.398  | .810              | 2.412 |
|                                                                             | V7 EFFICACY       | .289  | .249   | 1.343 | 1           | .247         | 1.335  | .819              | 2.176 |
|                                                                             | V8_SOCIALBARRIERS | -.293 | .360   | .661  | 1           | .416         | .746   | .369              | 1.511 |
|                                                                             | V11_STIGMA        | -.173 | .273   | .399  | 1           | .527         | .841   | .492              | 1.438 |
|                                                                             | D1_SCHIZPTLOAD    | .004  | .007   | .353  | 1           | .553         | 1.004  | .990              | 1.018 |
|                                                                             | D3_YEARS          | -.028 | .021   | 1.786 | 1           | .181         | .972   | .933              | 1.013 |
|                                                                             | D4_SUPPORT        | .025  | .030   | .688  | 1           | .407         | 1.025  | .967              | 1.086 |
|                                                                             | D5_ROLE           | .305  | .569   | .287  | 1           | .592         | 1.356  | .445              | 4.138 |
|                                                                             | D6_cert           | -.029 | .431   | .004  | 1           | .947         | .972   | .418              | 2.260 |
| 14. How likely is this patient to experience a relapse? – Please select one | 2.214             | .347  | 40.658 | 1     | <b>.000</b> | <b>9.155</b> | 4.635  | 18.083            |       |
| Constant                                                                    | -12.082           | 2.846 | 18.026 | 1     | .000        | .000         |        |                   |       |

**Note:** <sup>a</sup>Variable(s) entered on step 1: V1\_CONFIDENCE, V2\_MEDBARRIERS, V3\_EMERGINGTx, V4\_LACKEXPERIENCE, V5\_PATIENTLIMIT, V6\_SAFETY, V7 EFFICACY, V8\_SOCIALBARRIERS, V11\_STIGMA, D1\_SCHIZPTLOAD, D3\_YEARS, D4\_SUPPORT, D5\_ROLE, D6\_cert, 14. How likely is this patient to experience a relapse? – Please select one.
